## Correction

**Correction: Withaferin A (WFA) inhibits tumor growth and metastasis by targeting ovarian cancer stem cells****Sham S. Kakar<sup>1,2</sup>, Seema Parte<sup>2</sup>, Kelsey Carter<sup>1</sup>, Irving G. Joshua<sup>1</sup>, Christopher Worth<sup>2</sup>, Pranela Rameshwar<sup>3</sup> and Mariusz Z. Ratajczak<sup>4</sup>**<sup>1</sup>Department of Physiology, University of Louisville, Louisville, KY 40202, USA<sup>2</sup>James Graham Brown Cancer Center, University of Louisville, Louisville, KY 40202, USA<sup>3</sup>Department of Medicine, Hematology/Oncology, Rutgers, New Jersey Medical School, Newark, NJ 07103, USA<sup>4</sup>Department of Medicine, University of Louisville, Louisville, KY 40202, USA*Published: August 11, 2020***Copyright:** Kakar et al. This is an open-access article distributed under the terms of the Creative Commons Attribution License 3.0 (CC BY 3.0), which permits unrestricted use, distribution, and reproduction in any medium, provided the original author and source are credited.**This article has been corrected:** In Figure 3, panel F is an accidental duplicate of panel C. The corrected Figure 3 is shown below. The authors declare that these corrections do not change the results or conclusions of this paper.Original article: Oncotarget. 2017; 8:74494–74505. <https://doi.org/10.18632/oncotarget.20170>

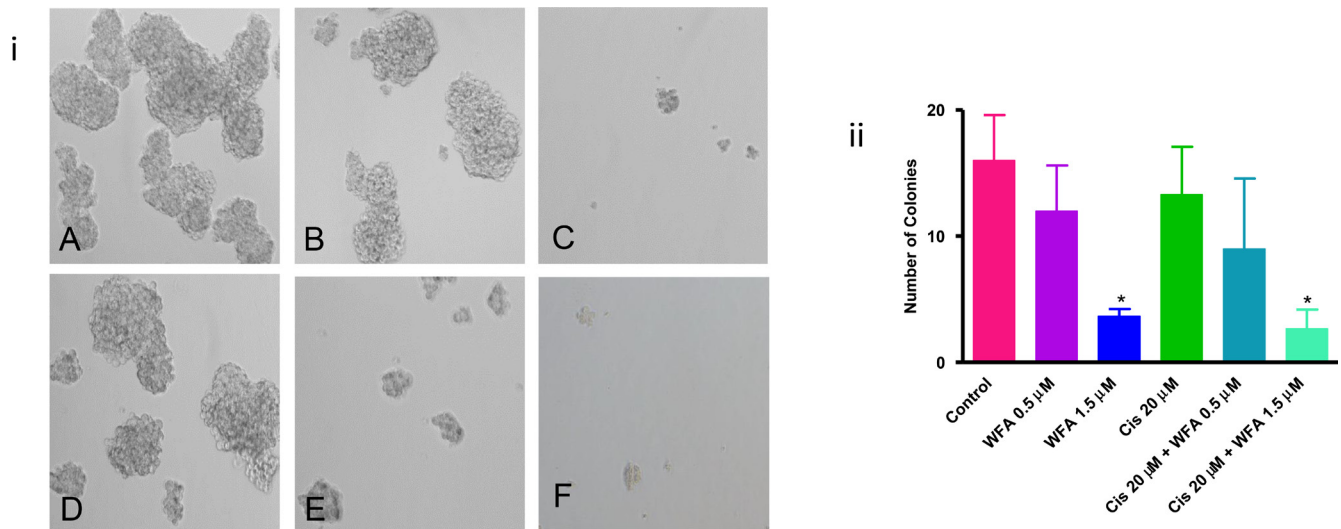

**Figure 3: Effect of WFA and CIS both alone and in combination on spheroid formation.** (A) - Control, (B) - WFA (0.5  $\mu$ M), (C) - WFA (1.5  $\mu$ M), (D) - CIS (20  $\mu$ M), (E) - WFA (0.5  $\mu$ M) + CIS (20  $\mu$ M), and (F) - WFA (1.5  $\mu$ M) + CIS (20  $\mu$ M). i) Photomicrographs of spheroids under various treatment groups as described above. ii) Quantitative analysis of spheroids. Spheroids > 50  $\mu$ m were counted. The number shown is average of spheroids counted in 6 different low power fields at 200X. Data shown is representative of three independent experiments. \* represents  $p < 0.05$ .
